# Supplementary material for: Two Drosophila Neuropeptide Y-like Neurons Define a Reward Module for Transforming Appetitive Odor Representations to Motivation
Source: PubMed Central journal article supplement (PMC6076267; doi:10.1038/s41598-018-30113-5), 2018-08-03
Supplement: 41598_2018_30113_MOESM1_ESM.pdf [file 41598_2018_30113_MOESM1_ESM.pdf]

# Supplemental information

## **Two *Drosophila* Neuropeptide Y-like Neurons Define a Reward Module for Transforming Appetitive Odor Representations to Motivation**

**Yuhan Pu<sup>1</sup>, Yiwen Zhang<sup>1</sup>, Yan Zhang and Ping Shen\***

Department of Cellular Biology and Biomedical and Health Sciences Institute, University of Georgia,  
500 D. W. Brooks Drive, Athens, GA 30602, USA

<sup>1</sup> Co-first authors

\* Correspondence should be addressed to P.S. (pshen@uga.edu)

**Figure S1 Anatomical analysis of NPFR1-Gal4 neurons in the SEZ**

A pair of four NPFR1-Gal4 neurons, labeled by mCD8::GFP, is present in the SEZ. The inset shows a magnified view of their axons exiting from the antenna nerve.

**Figure S2 Images of control larvae from the split GFP analysis**

**A)** the image of the brain lobe from *TH-Gal4 /UAS-CD4::spGFP<sup>1-10</sup> ; LexAop-CD4::spGFP<sup>11</sup>* larvae; **B)** the image of the brain lobe from *NPF-Gal4 /UAS-CD4::spGFP<sup>1-10</sup> ; LexAop-CD4::spGFP<sup>11</sup>* larvae. No split GFP signals were detected in the control brain tissues. N = 6-8.

**FigS1**

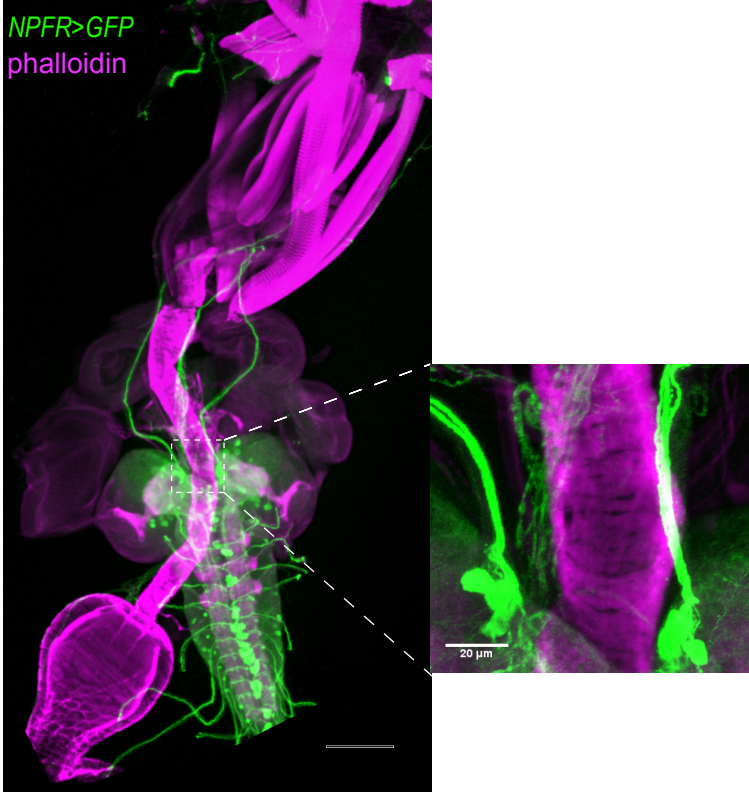

**FigS2**

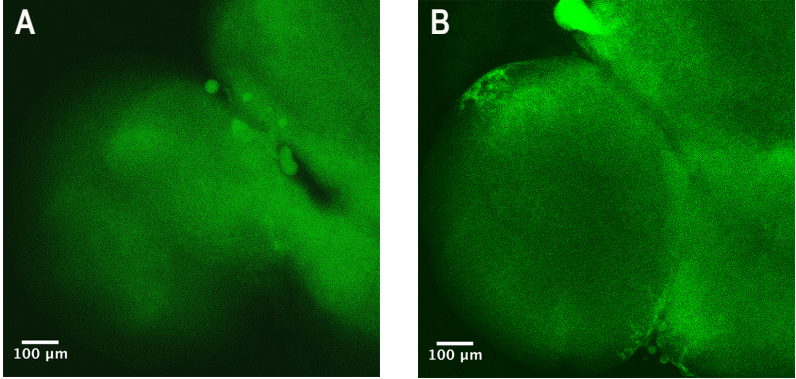

*TH-Gal4/UAS-CD4::spGFP<sup>1-10</sup>; LexAop-CD4::spGFP<sup>11</sup>*

*NPF-LexA/UAS-CD4::spGFP<sup>1-10</sup>; LexAop-CD4::spGFP<sup>11</sup>*
